# Supplementary material for: Biological Mineralization of Hydrophilic Intraocular Lenses
Source: MDPI journal article supplement (doi:10.3390/cryst12101418), 2022-10-08
Supplement: s1 [file s1]

Archive with 1 entries (1 files):
- crystals-1914966-supplementary.pdf
