# Supplementary material for: Biological Mineralization of Hydrophilic Intraocular Lenses
Source: MDPI journal article supplement (doi:10.3390/cryst12101418), 2022-10-08
Supplement: s1 [file s1 › crystals-1914966-supplementary.pdf]

## Supplementary material

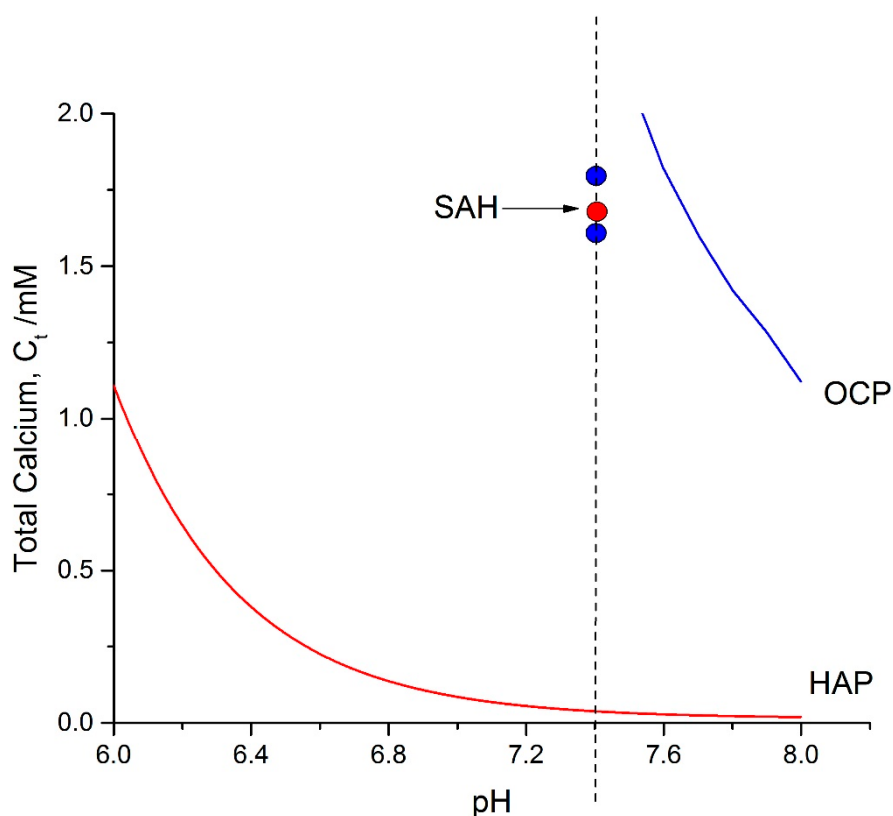

**Figure S1.** Solubility isotherms calculated for HAP and OCP; 0.15 M NaCl; Total Calcium: Total Phosphate = 1.67. Red circle: Simulated aqueous humor; Blue circles define the limits of calcification experiments in the present work.

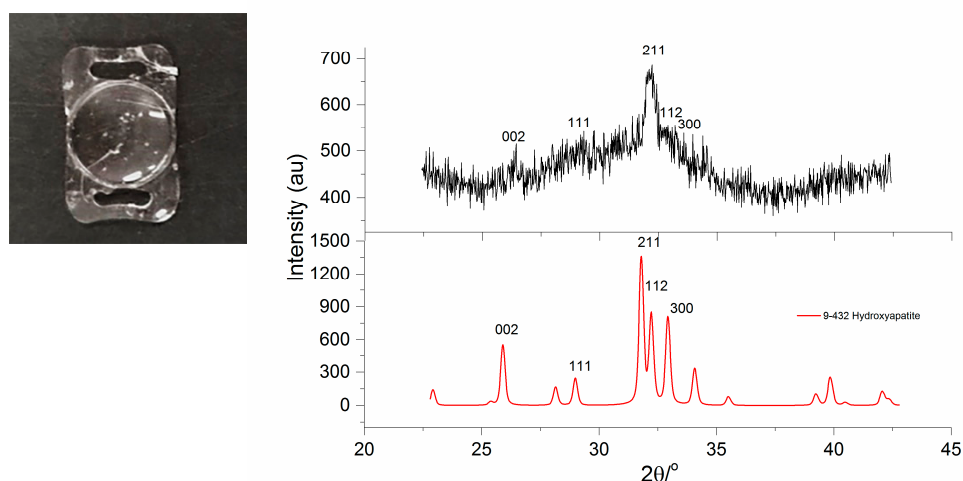

**Figure S2.** Left: Photograph of the opacified IOL with HAP deposits. X-Ray diffractogram of the calcified hydrophilic IOL; simulated aqueous humor, Total Calcium,  $C_a=1.7$  mM, Total Phosphate,  $P_i=0.6$  mM, 0.15M NaCl, pH 7.40, 37°C. Upper diffractogram IOL. Lower: Standard from International Center for Diffraction Data (ICDD) PDF-2 Database, Card File No. 9-432 for HAP.

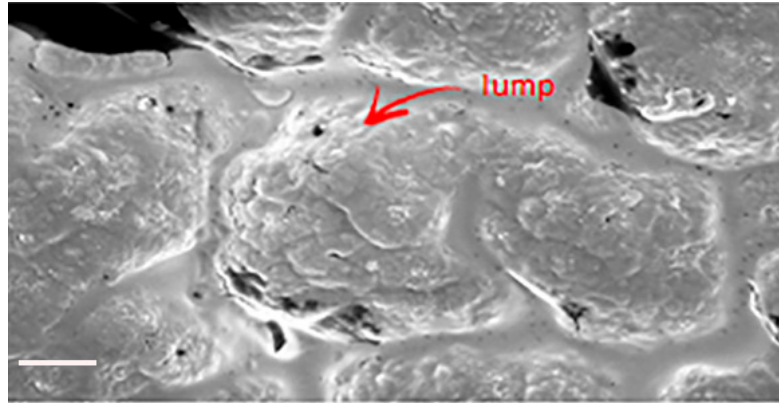

a

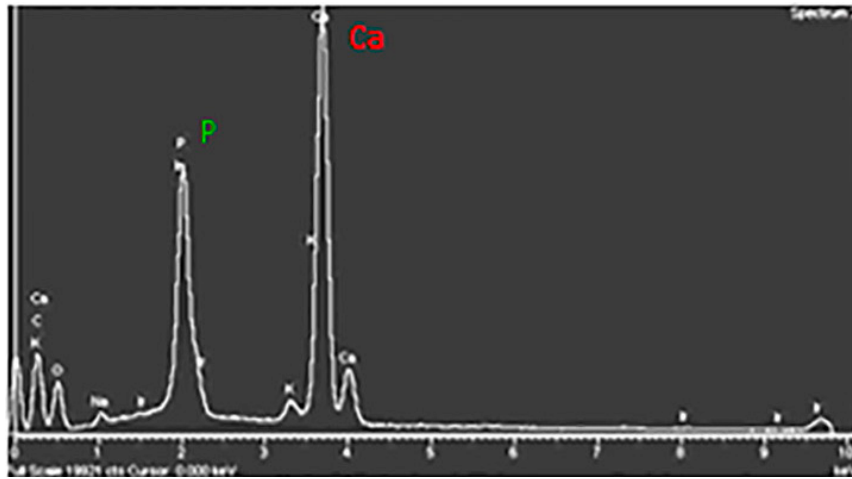

b

**Figure S3.** calcification of hydrophilic IOLs below the surface; (a) The surface of the IOLs is characterized by the presence of lumps which contain HAP formed in the interior of the IOL. Bar 2 $\mu$ M. (b) EDX microanalysis of the lumps on the surface of the IOL showing that they consist of calcium phosphate crystal deposits.
